# Supplementary material
Source: publisher figshare collection journal article supplement (https://tandf.figshare.com/ndownloader/files/20710071)
Supplement: Supplementary file 1 [file 20710071]

**Supplementary material: Interview Guide**

| ***SHOWeD Framework [22]***  1) What do you **S**ee here?  2) What is really **H**appening here?   - Probe: What does the picture represent to you? What is happening that caused you to take this photo?   3) How does this relate to **O**ur lives?   - Probe: How does this issue or factor impact your life?   4) **W**hy does this situation, concern or strength **e**xist?  5) What can we **D**o about it?   - Probe: How do you think the situation could be improved?   ***Additional open-ended questions***  1) How do falls impact your daily life?  2) Are there any activities that you choose not to participate in because you are afraid of falling?  3) How concerned are you about falls on a daily basis?  4) What else you would like to discuss that can help us understand how falls impact your life? |
| --- |
